# Supplementary material for: A new method for isolation and purification of fusion-competent inhibitory synaptic vesicles
Source: PubMed Central journal article supplement (PMC10990708; doi:10.1016/j.crphys.2024.100121), 2024-02-23
Supplement: mmc1.pdf [file mmc1.pdf]

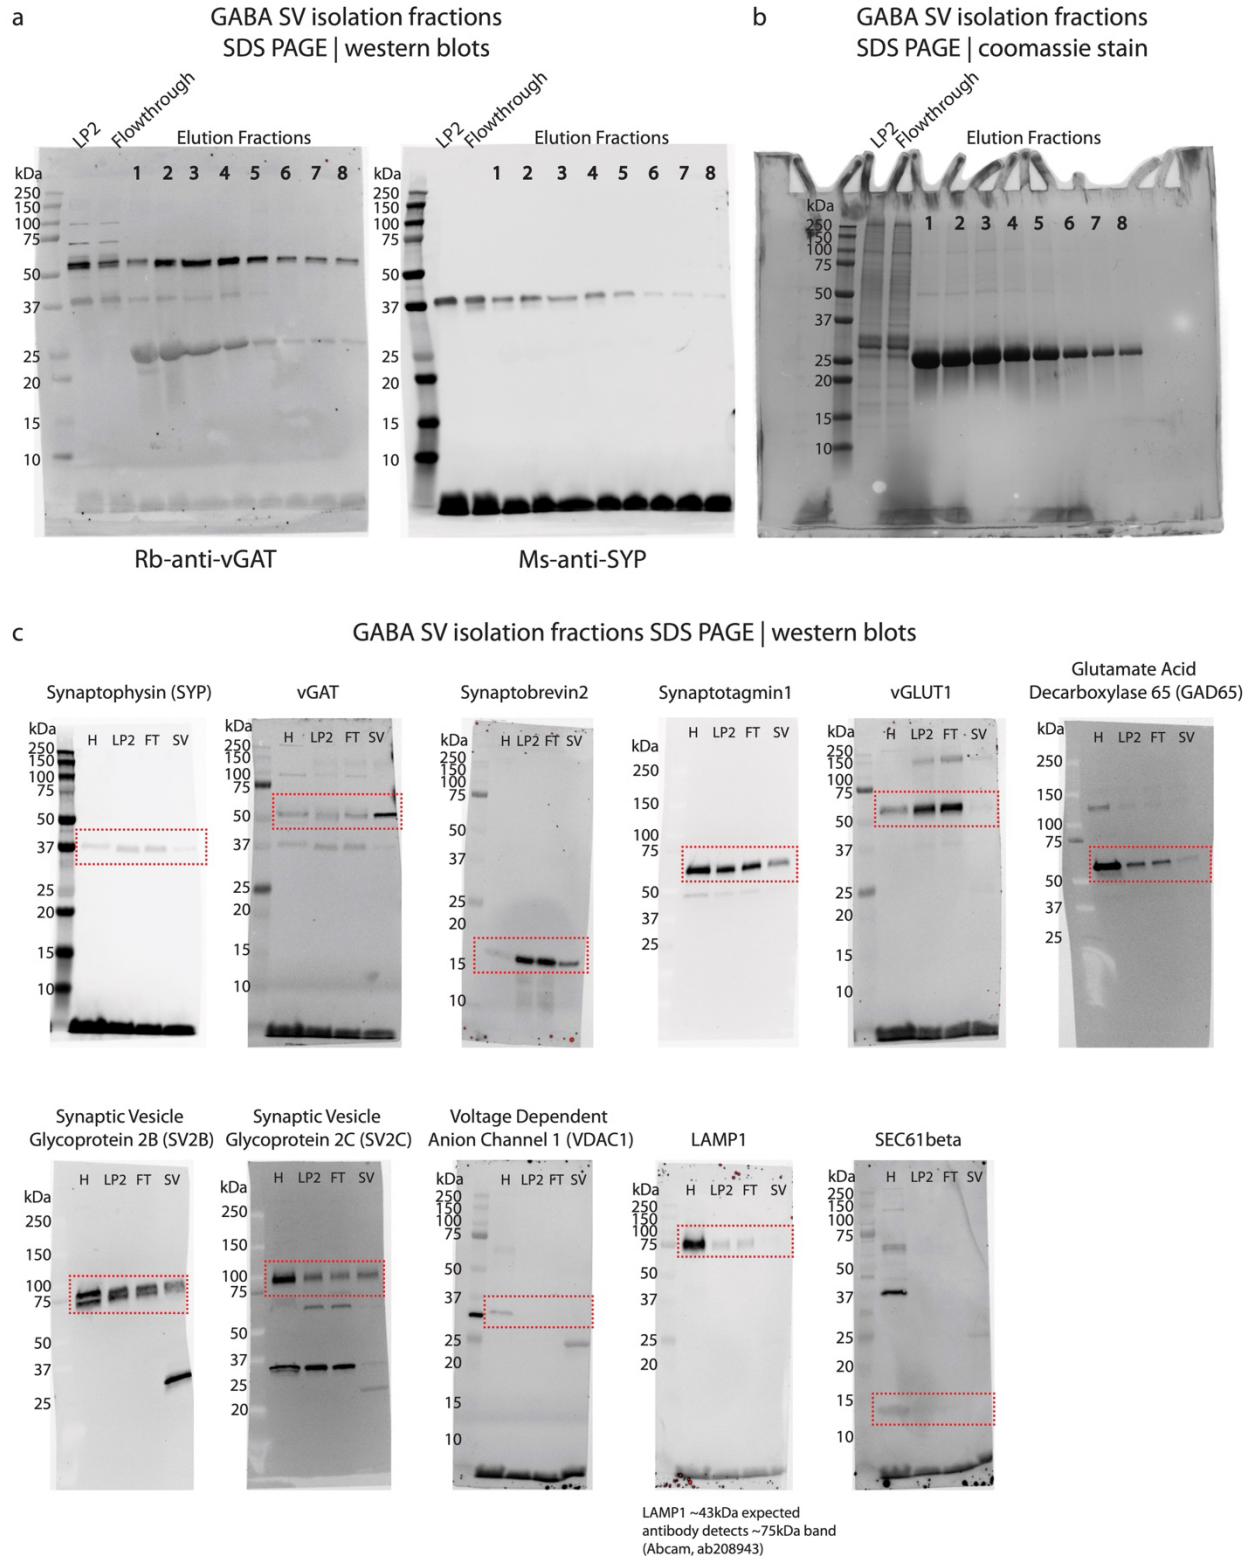

**Supplementary Figure 1. Original western blot images corresponding to Figures 1 and 2, unadjusted, uncropped, and unrotated. (a)** Western blot analysis of GABA SV isolation fractions including starting material (LP2) and flowthrough as well as biotin elution fractions 1-8. The membrane was blotted with a polyclonal rabbit anti-vGAT

antibody and an 800CW goat-anti-rabbit secondary antibody (**Supplementary Table 1** for antibody details). **(b)** Coomassie-stained SDS PAGE analysis of GABA SV isolation fractions including starting material, Streptactin flowthrough as well as biotin elution fractions 1-8. **(c)** Uncropped, original western blots of homogenate, LP2, FT, and purified SVs blotted for a variety of proteins (**Supplementary Table 1** for antibody details).

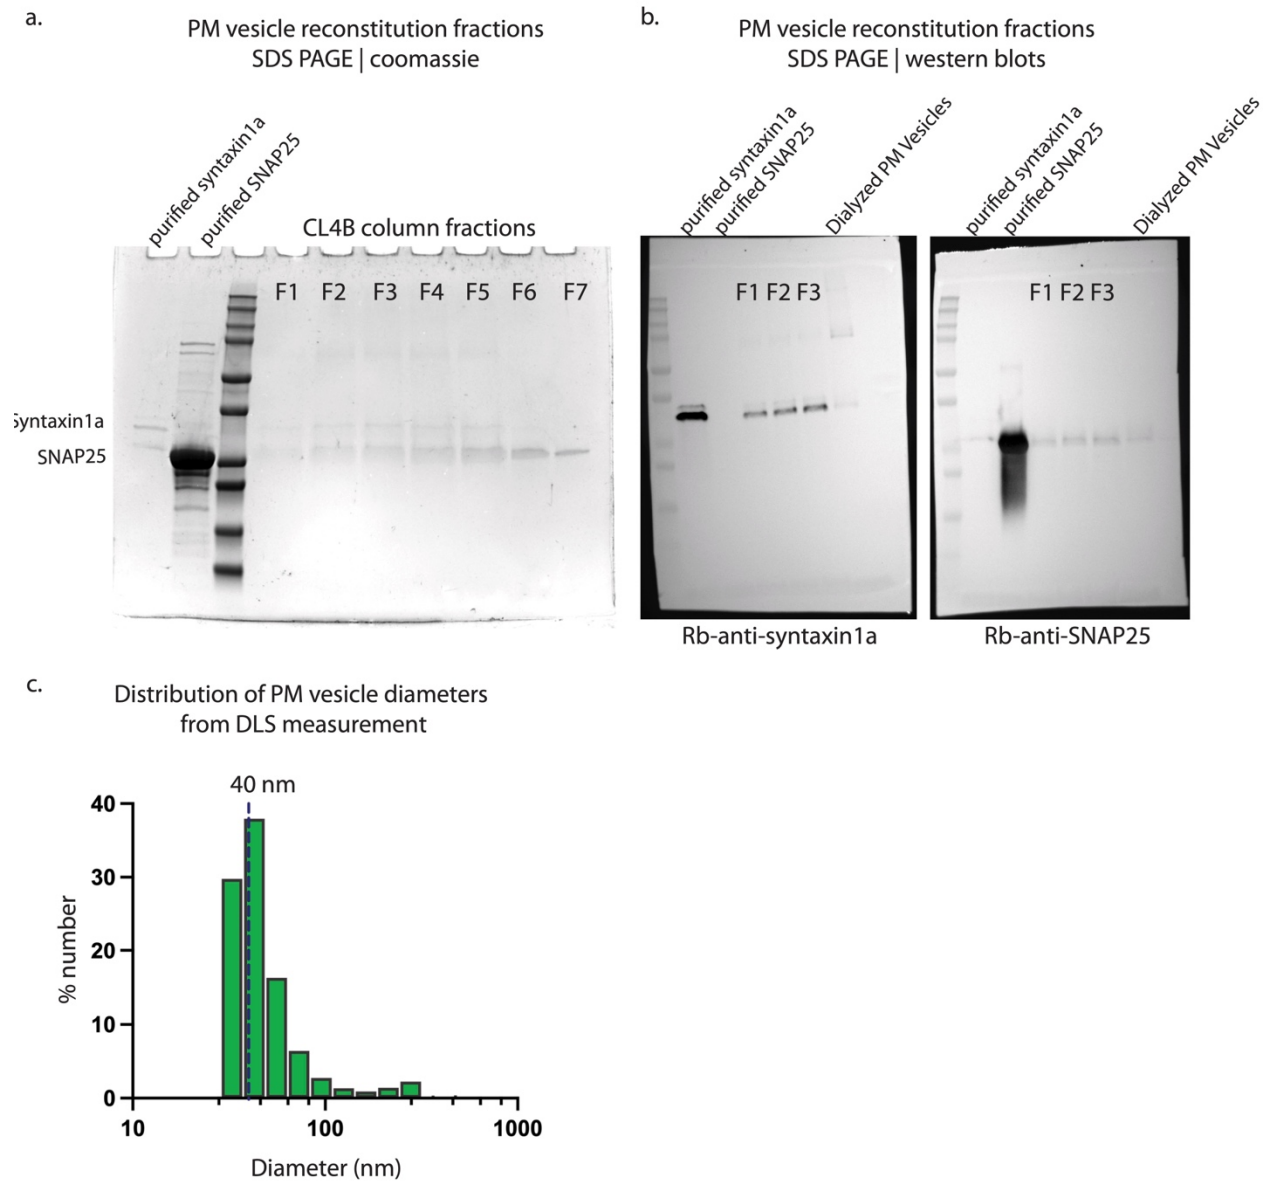

**Supplementary Figure 2. Reconstitution of PM vesicles. (a)** Coomassie-stained SDS PAGE image of PM vesicle reconstitution fractions, showing input protein as well as 200  $\mu$ L fractions 1-4 after passing the protein-lipid mixture through a CL4B column. **(b)** Western blot images of PM vesicle reconstitution fractions showing input proteins and post CL4B fractions 1-3, as well as the PM vesicle sample after overnight dialysis. The top image is an anti-syntaxin western blot and the bottom image is an anti-SNAP 25 western blot. **(c)** Frequency distribution of PM vesicle diameters, as determined by dynamic light scattering measurements.



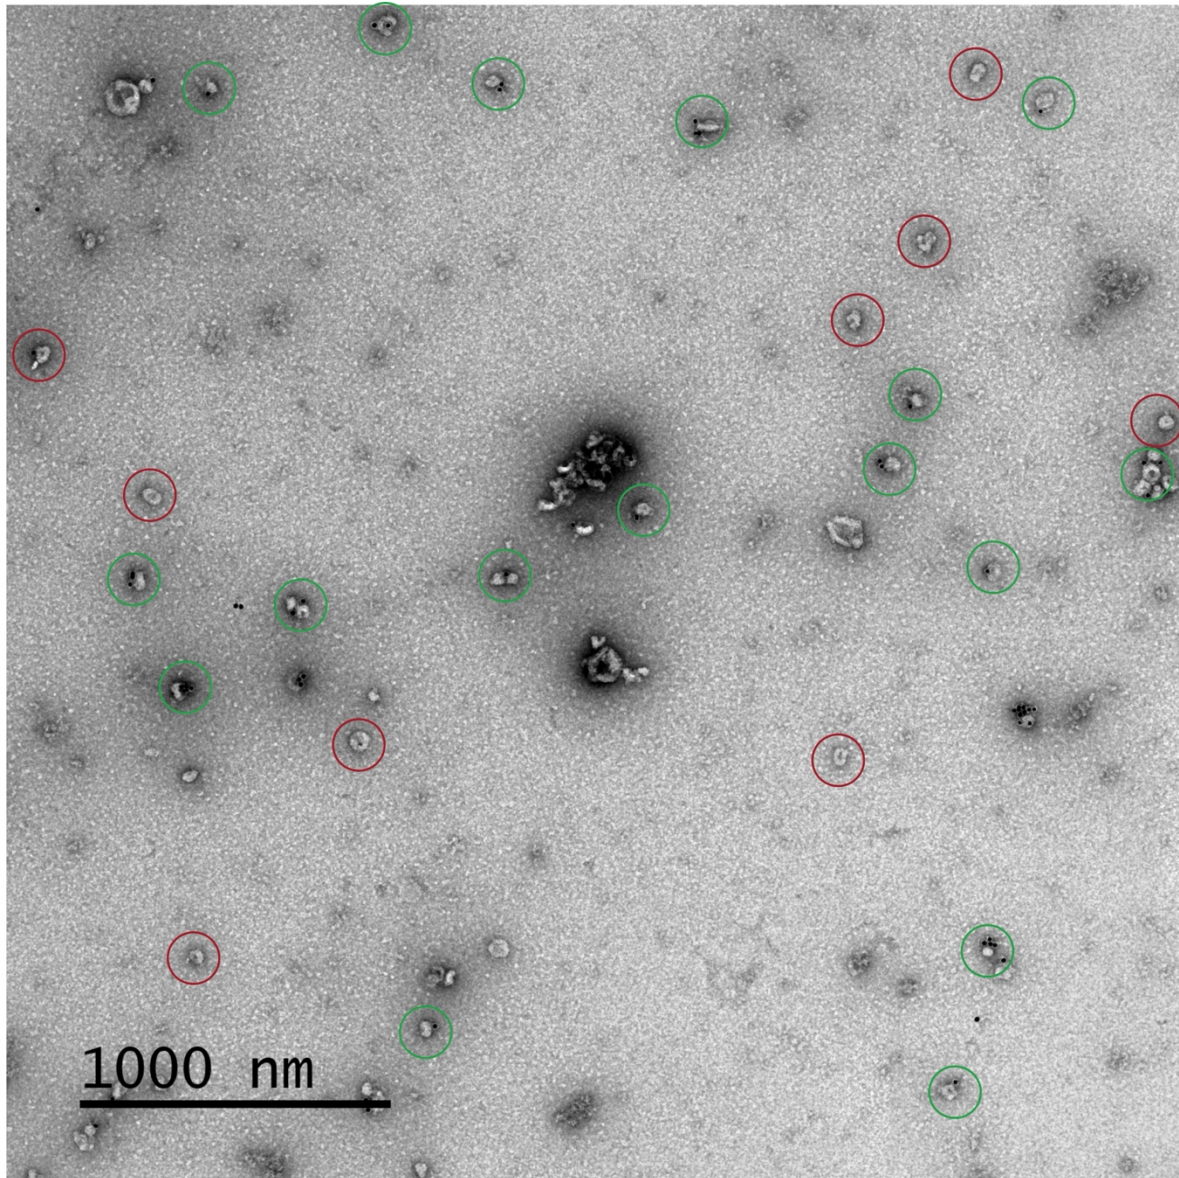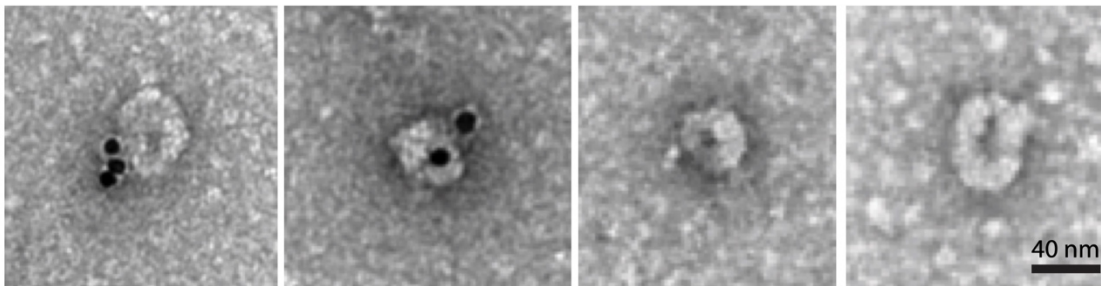

**Supplementary Figure 3. Labeling of GABA SVs with anti-SYP-Alexa-647.**

Representative negative stain EM micrograph of Alexa-647-SVs labeled with 15 nm gold conjugated anti-rabbit Fab. The dataset that includes this representative micrograph had a labeling efficiency between 40-60% and a range of partial efficiencies was observed for other preparations. Green circles denote SVs with gold particles

attached and red circles denote SVs without gold particles attached. Bottom: close-up view examples of GABA SVs with and without gold particles. Additional negative stain EM images are available in the data repository associated with this work.

**Supplementary Table 1**

| Antibodies Used                                     |               |                           |           |
|-----------------------------------------------------|---------------|---------------------------|-----------|
| Antibody                                            | Dilution Used | Vendor                    | Cat #     |
| Rabbit - anti vGAT                                  | 1:2500        | Synaptic Systems          | 131103    |
| Mouse - anti Synaptophysin                          | 1:500         | Abcam                     | ab8049    |
| Rabbit - anti vGLUT11                               | 1:2500        | Synaptic Systems          | 135303    |
| Rabbit - Synaptotagmin1                             | 1:1000        | Abcam                     | ab126253  |
| Mouse - Synaptobrevin/VAMP2                         | 1:1000        |                           |           |
| Rabbit - SV2C                                       | 1:1000        | Synaptic Systems          | 119203    |
| Rabbit - SV2B                                       | 1:1000        | Synaptic Systems          | 119103    |
| Rabbit - GAD65                                      |               | Abcam                     | ab239372  |
| Mouse - VDAC                                        | 1:1000        | Santa Cruz Bio Technology | sc-390996 |
| Rabbit - Sec61 $\beta$                              | 1:1000        | Abcam                     | ab229542  |
| Rabbit - LAMP1                                      | 1:1000        | Abcam                     | ab208943  |
| IRDye 800CW Goat anti-Rabbit IgG Secondary Antibody | 1:5000        | Licor                     | 926-32211 |
| IRDye 800CW Goat anti-Mouse IgG Secondary Antibody  | 1:5000        | Licor                     | 926-32210 |
| IRDye 680CW Goat anti-Mouse IgG Secondary Antibody  | 1:5000        | Licor                     | 926-68070 |

**Supplementary Table 2**

| Association Data                                             |       |
|--------------------------------------------------------------|-------|
| Movies                                                       | 25    |
| Experimental preparations<br>(# of separate LP2 preparation) | 1     |
| Total ROI                                                    | 9,728 |
| Single vesicle association                                   | 296   |
| Multiple vesicle association                                 | 17    |
| Fusion Events                                                | 3     |
| Immediate Fusion                                             | 1     |
| Delayed Fusion                                               | 2     |

**Supplementary Table 3**

| Triggered Fusion Data              |        |                                                              |           |               |                                                     |
|------------------------------------|--------|--------------------------------------------------------------|-----------|---------------|-----------------------------------------------------|
|                                    | Movies | Experimental preparations<br>(# of separate LP2 preparation) | Total ROI | Fusion Events | Fusion events during first second after Ca/Mg entry |
| 500 $\mu\text{M}$ $\text{Ca}^{2+}$ | 62     | 3                                                            | 25237     | 135           | 23                                                  |
| 250 $\mu\text{M}$ $\text{Ca}^{2+}$ | 28     | 3                                                            | 11,849    | 65            | 13                                                  |
| 50 $\mu\text{M}$ $\text{Ca}^{2+}$  | 13     | 3                                                            | 3,537     | 41            | 2                                                   |
| 500 $\mu\text{M}$ $\text{Mg}^{2+}$ | 27     | 3                                                            | 12951     | 13            | 0                                                   |
